# Supplementary material for: Pitfall in simulations of vibronic TD-DFT spectra: diagnosis and assessment
Source: Royal Society of Chemistry journal article supplement (doi:10.1039/d3cp04276f), 2023-01-01
Supplement: d3cp04276f1.pdf [file d3cp04276f1.pdf]

# Pitfall in simulations of vibronic TD-DFT spectra: Diagnosis and assessment

## SUPPORTING INFORMATION

Sebastian P. Sitkiewicz,<sup>\*,a</sup> Eduard Matito,<sup>b,c</sup> Josep M. Luis,<sup>\*,d</sup> Robert Zaleśny<sup>\*,e</sup>

<sup>a</sup> Wrocław Centre for Networking and Supercomputing, Wrocław University of Science and Technology,  
Wyb. Wyspiańskiego 27, PL-50370 Wrocław, Poland

<sup>b</sup> Donostia International Physics Center (DIPC), Manuel Lardizabal Ibilbidea 4, 20018 Donostia,  
Euskadi, Spain

<sup>c</sup> Ikerbasque Foundation for Science, 48011 Bilbao, Euskadi, Spain

<sup>d</sup> Institute of Computational Chemistry and Catalysis and Department of Chemistry, University of Girona,  
Campus de Montilivi, 17003, Girona, Catalonia, Spain.

<sup>e</sup> Faculty of Chemistry, Wrocław University of Science and Technology, Wybrzeże Wyspiańskiego 27,  
50-370 Wrocław, Poland

\*E-mail: [sebastian.p.sitkiewicz@gmail.com](mailto:sebastian.p.sitkiewicz@gmail.com) (S.P.S.),  
[josepm.luis@udg.edu](mailto:josepm.luis@udg.edu) (J.M.L.), [robert.zalesny@pwr.edu.pl](mailto:robert.zalesny@pwr.edu.pl) (R.Z.)

During the RRMSE calculations (which required many single-point-type calculations) the following convergence criteria in Gaussian 16 were used:  $10^{-11}$  in SCF (DIIS error),  $10^{-11}$  in CP-KS, and  $10^{-7}$  ( $10^{-8}$  for formaldehyde) during the TD-DFT computations. Geometries were optimized using the VeryTight convergence criterion. For the optimization procedures and the frequency calculations (which are required for the numerical evaluation of high order energy-derivatives necessary for the simulation of anharmonic vibronic spectra), we used a respective set of criteria:  $10^{-10}$  in SCF,  $10^{-11}$  in CP-KS, and  $10^{-7}$  in TD-DFT. In all of the computations, the threshold for two-electron integral screening was set to  $10^{-14}$ .

**Table S1:** Average RRMSE for  $d^3E/dQ^3$  (averaging over all available normal modes) and different electronic states of formaldehyde, pyridine, and furan, computed with tested DFAs and several unpruned integration grids. For all molecular systems,  $1^1A_1$  denotes the electronic ground-state, and other states are the selected bright excited states. In the case of furan,  $1^2A_2$  corresponds to the lowest electronic state of its ionized form, i.e. the electronic ground-state of furan cation.

|           |           | FORMALDEHYDE |          |          | PYRIDINE |          | FURAN    |          |
|-----------|-----------|--------------|----------|----------|----------|----------|----------|----------|
|           |           | $1^1A_1$     | $1^1A_2$ | $1^1B_2$ | $1^1A_1$ | $1^1B_1$ | $1^1A_1$ | $1^2A_2$ |
| LC-BLYP   | (99,590)  | 0            | 0        | 0        | 4        | 1        | 5        | 0        |
|           | (250,974) | 0            | 0        | 0        | 1        | 0        | 0        | 0        |
|           | (750,974) | 0            | 0        | 0        | 1        | 0        | 0        | 0        |
| CAM-B3LYP | (99,590)  | 0            | 0        | 1        | 4        | 1        | 3        | 0        |
|           | (250,974) | 0            | 0        | 0        | 1        | 0        | 1        | 0        |
|           | (750,974) | 0            | 0        | 0        | 1        | 0        | 1        | 0        |
| wB97X     | (99,590)  | 2            | 9        | 9        | 90       | 52       | 65       | 15       |
|           | (250,974) | 0            | 1        | 0        | 33       | 22       | 32       | 7        |
|           | (750,974) | 0            | 1        | 0        | 32       | 16       | 32       | 7        |
| M06-2X    | (99,590)  | 17           | 16       | 22       | 81       | 21       | 59       | 13       |
|           | (250,974) | 4            | 11       | 23       | 22       | 10       | 37       | 4        |
|           | (750,974) | 4            | 11       | 23       | 22       | 10       | 37       | 4        |

**Table S2:** Average arithmetic mean of RRMSEs of different components of transition dipole moment (calculated as  $1/3 \sum_{i=x,y,z} \text{RRMSE}[d^2 \langle 1^1A_1 | \hat{\mu}_i | X \rangle / dQ^2]$ ) from ground electronic state  $1^1A_1$  to different electronic state  $X$  of formaldehyde and pyridine (averaging over all available normal modes). Normal modes corresponded to the optimized geometry of the ground electronic states. Results for furan are not shown, due to the fact that for furan, the vertical photoionization from  $1^1A_1$  to  $1^2A_2$  is dipole forbidden.

|           |           | FORMALDEHYDE |          | PYRIDINE |
|-----------|-----------|--------------|----------|----------|
|           |           | $1^1A_2$     | $1^1B_2$ | $1^1B_1$ |
| LC-BLYP   | (99,590)  | 0            | 0        | 2        |
|           | (250,974) | 0            | 0        | 2        |
|           | (750,974) | 0            | 0        | 2        |
| CAM-B3LYP | (99,590)  | 0            | 4        | 1        |
|           | (250,974) | 0            | 0        | 1        |
|           | (750,974) | 0            | 0        | 1        |
| wB97X     | (99,590)  | 4            | 1        | 2        |
|           | (250,974) | 0            | 0        | 2        |
|           | (750,974) | 0            | 0        | 1        |
| M06-2X    | (99,590)  | 16           | 3        | 4        |
|           | (250,974) | 1            | 0        | 3        |
|           | (750,974) | 1            | 0        | 3        |

Table S3: Average RRMSE for  $d^3\langle 1^1A_1|\bar{\mu}|X\rangle/dQ^3$ , where  $\bar{\mu} = \frac{1}{3}(\hat{\mu}_x + \hat{\mu}_y + \hat{\mu}_z)$  from ground electronic state  $1^1A_1$  to different electronic state  $X$  of formaldehyde and pyridine (averaging over all available normal modes). Normal modes corresponded to the optimized geometry of the ground electronic states. Results for furan are not shown, due to the fact that for furan, the vertical photoionization from  $1^1A_1$  to  $1^2A_2$  is dipole forbidden.

|           |           | FORMALDEHYDE |          | PYRIDINE |
|-----------|-----------|--------------|----------|----------|
|           |           | $1^1A_2$     | $1^1B_2$ | $1^1B_1$ |
| LC-BLYP   | (99,590)  | 0            | 0        | 4        |
|           | (250,974) | 0            | 0        | 8        |
|           | (750,974) | 0            | 0        | 2        |
| CAM-B3LYP | (99,590)  | 0            | 7        | 3        |
|           | (250,974) | 0            | 1        | 5        |
|           | (750,974) | 0            | 1        | 3        |
| WB97X     | (99,590)  | 5            | 4        | 36       |
|           | (250,974) | 0            | 1        | 20       |
|           | (750,974) | 0            | 1        | 11       |
| M06-2X    | (99,590)  | 24           | 78       | 288      |
|           | (250,974) | 2            | 10       | 18       |
|           | (750,974) | 2            | 10       | 20       |

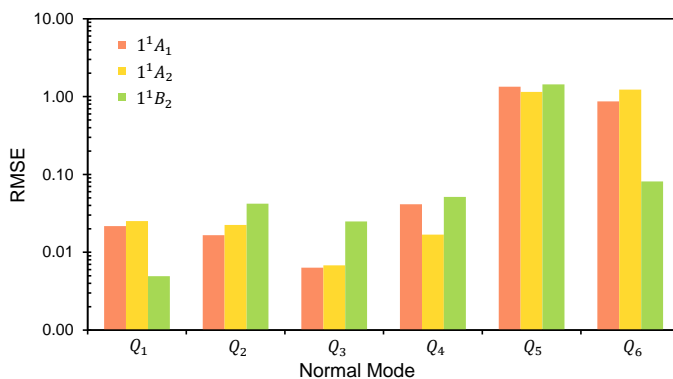

Figure S1: RMSE for  $d^4E/dQ_n^4$  for different normal modes  $Q_n$  of formaldehyde corresponding to the optimized geometries of the selected electronic states of formaldehyde, computed with M06-2X and the (99,590) integration grid.

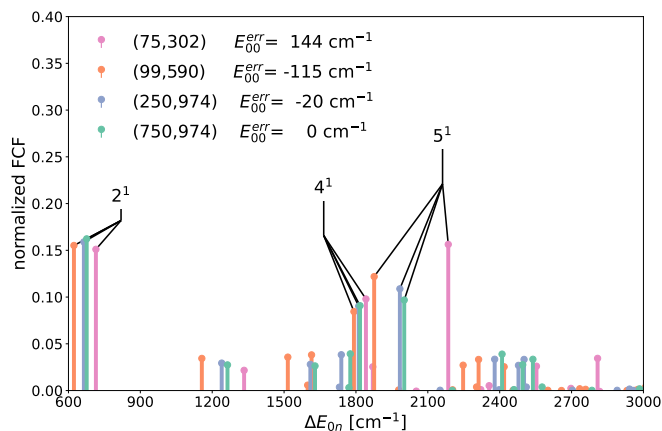

Figure S2: Normalized PT2 FC spectra of the  $1^1A_1 \rightarrow 1^1B_2$  ( $S_0 \rightarrow S_2$ ) transition of formaldehyde obtained with  $\omega$ B97-X using various integration grids and  $0.02|Q|$  step size for numerical differentiation. On the horizontal axis, differences with respect to the anharmonic 0-0 band are shown ( $\Delta E_{0n} = E_{0n} - E_{00}$ ). On the legend, next to the grid labels, the corresponding errors in the anharmonic transition energies of 0-0 band, when compared to the reference (750,974) grid, are given ( $E_{00}^{err} = E_{00} - E_{00}^{(750,974)}$ ).

## Optimized geometries

formaldehyde 1<sup>1</sup>A<sub>1</sub> state, LC-BLYP(250,974)/6-311++G\*\*  
O 0.000000 0.000000 0.595619  
C 0.000000 0.000000 -0.596307  
H 0.000000 0.939677 -1.176385  
H 0.000000 -0.939677 -1.176385

formaldehyde 1<sup>1</sup>A<sub>1</sub> state, M06-2X(250,974)/6-311++G\*\*  
O 0.000000 0.000000 0.597941  
C 0.000000 0.000000 -0.598713  
H 0.000000 0.939401 -1.180490  
H 0.000000 -0.939401 -1.180490

formaldehyde 1<sup>1</sup>A<sub>1</sub> state, wB97X(250,974)/6-311++G\*\*  
O 0.000000 0.000000 0.599246  
C 0.000000 0.000000 -0.599891  
H 0.000000 0.940493 -1.183834  
H 0.000000 -0.940493 -1.183834

formaldehyde 1<sup>1</sup>A<sub>2</sub> state, LC-BLYP(250,974)/6-311++G\*\*  
O 0.627015 0.006654 0.000000  
C -0.639214 -0.030025 0.000000  
H -1.170085 0.125946 0.943797  
H -1.170085 0.125946 -0.943797

formaldehyde 1<sup>1</sup>A<sub>2</sub> state, M06-2X(250,974)/6-311++G\*\*  
O 0.631462 0.011004 0.000000  
C -0.648254 -0.051961 0.000000  
H -1.151553 0.222027 0.933687  
H -1.151553 0.222027 -0.933687

formaldehyde 1<sup>1</sup>A<sub>2</sub> state, wB97X(250,974)/6-311++G\*\*  
O 0.632854 0.010067 0.000000  
C -0.648508 -0.046964 0.000000  
H -1.161086 0.199708 0.938452  
H -1.161086 0.199708 -0.938452

formaldehyde 1<sup>1</sup>B<sub>2</sub> state, LC-BLYP(250,974)/6-311++G\*\*  
O 0.000000 0.000000 0.581260  
C 0.000000 0.000000 -0.581071  
H 0.000000 0.979031 -1.153157  
H 0.000000 -0.979031 -1.153157

formaldehyde 1<sup>1</sup>B<sub>2</sub> state, M06-2X(250,974)/6-311++G\*\*  
O 0.000000 0.000000 0.584188  
C 0.000000 0.000000 -0.580836  
H 0.000000 0.964089 -1.177786  
H 0.000000 -0.964089 -1.177786

formaldehyde 1<sup>1</sup>B<sub>2</sub> state, wB97X(250,974)/6-311++G\*\*

|   |          |           |           |
|---|----------|-----------|-----------|
| O | 0.000000 | -0.000000 | 0.585755  |
| C | 0.000000 | 0.000000  | -0.587958 |
| H | 0.000000 | 0.988764  | -1.147816 |
| H | 0.000000 | -0.988764 | -1.147816 |

furan 1<sup>1</sup>A<sub>1</sub> state, LC-BLYP(250,974)/6-311++G\*\*

|   |          |           |           |
|---|----------|-----------|-----------|
| C | 0.000000 | 0.713407  | -0.973576 |
| C | 0.000000 | -0.713407 | -0.973576 |
| C | 0.000000 | -1.082669 | 0.315702  |
| O | 0.000000 | 0.000000  | 1.115277  |
| C | 0.000000 | 1.082669  | 0.315702  |
| H | 0.000000 | 1.370780  | -1.827511 |
| H | 0.000000 | -1.370780 | -1.827511 |
| H | 0.000000 | -2.039130 | 0.810585  |
| H | 0.000000 | 2.039130  | 0.810585  |

furan 1<sup>1</sup>A<sub>1</sub> state, M06-2X(250,974)/6-311++G\*\*

|   |          |           |           |
|---|----------|-----------|-----------|
| C | 0.000000 | 0.717566  | -0.982925 |
| C | 0.000000 | -0.717566 | -0.982925 |
| C | 0.000000 | -1.088799 | 0.319772  |
| O | 0.000000 | 0.000000  | 1.123367  |
| C | 0.000000 | 1.088799  | 0.319772  |
| H | 0.000000 | 1.375596  | -1.836126 |
| H | 0.000000 | -1.375596 | -1.836126 |
| H | 0.000000 | -2.043264 | 0.817848  |
| H | 0.000000 | 2.043264  | 0.817848  |

furan 1<sup>1</sup>A<sub>1</sub> state, wB97X(250,974)/6-311++G\*\*

|   |          |           |           |
|---|----------|-----------|-----------|
| C | 0.000000 | 0.717363  | -0.982419 |
| C | 0.000000 | -0.717363 | -0.982419 |
| C | 0.000000 | -1.088970 | 0.318334  |
| O | 0.000000 | 0.000000  | 1.124991  |
| C | 0.000000 | 1.088970  | 0.318334  |
| H | 0.000000 | 1.376274  | -1.837553 |
| H | 0.000000 | -1.376274 | -1.837553 |
| H | 0.000000 | -2.044929 | 0.817488  |
| H | 0.000000 | 2.044929  | 0.817488  |

furan 1<sup>2</sup>A<sub>2</sub> state, ULC-BLYP(250,974)/6-311++G\*\*

|   |          |           |           |
|---|----------|-----------|-----------|
| C | 0.000000 | 0.682104  | -1.006280 |
| C | 0.000000 | -0.682104 | -1.006280 |
| C | 0.000000 | -1.069124 | 0.339990  |
| O | 0.000000 | 0.000000  | 1.128954  |
| C | 0.000000 | 1.069124  | 0.339990  |
| H | 0.000000 | 1.355780  | -1.851083 |
| H | 0.000000 | -1.355780 | -1.851083 |
| H | 0.000000 | -2.037107 | 0.825833  |
| H | 0.000000 | 2.037107  | 0.825833  |

furan 1^2A\_2 state, UM06-2X(250,974)/6-311++G\*\*

|   |          |           |           |
|---|----------|-----------|-----------|
| C | 0.000000 | 0.688284  | -1.014992 |
| C | 0.000000 | -0.688284 | -1.014992 |
| C | 0.000000 | -1.075733 | 0.343089  |
| O | 0.000000 | 0.000000  | 1.137517  |
| C | 0.000000 | 1.075733  | 0.343089  |
| H | 0.000000 | 1.363904  | -1.857491 |
| H | 0.000000 | -1.363904 | -1.857491 |
| H | 0.000000 | -2.041028 | 0.831108  |
| H | 0.000000 | 2.041028  | 0.831108  |

furan 1^2A\_2 state, UwB97X(250,974)/6-311++G\*\*

|   |          |           |           |
|---|----------|-----------|-----------|
| C | 0.000000 | 0.687772  | -1.014431 |
| C | 0.000000 | -0.687772 | -1.014431 |
| C | 0.000000 | -1.075170 | 0.341539  |
| O | 0.000000 | 0.000000  | 1.139273  |
| C | 0.000000 | 1.075170  | 0.341539  |
| H | 0.000000 | 1.363143  | -1.858789 |
| H | 0.000000 | -1.363143 | -1.858789 |
| H | 0.000000 | -2.041701 | 0.830252  |
| H | 0.000000 | 2.041701  | 0.830252  |

pyridine 1^1A\_1 state, LC-BLYP(250,974)/6-311++G\*\*

|   |          |           |           |
|---|----------|-----------|-----------|
| C | 0.000000 | 0.000000  | -1.393935 |
| C | 0.000000 | 1.184580  | -0.691279 |
| C | 0.000000 | 1.131029  | 0.686842  |
| N | 0.000000 | 0.000000  | 1.369886  |
| C | 0.000000 | -1.131029 | 0.686842  |
| C | 0.000000 | -1.184580 | -0.691279 |
| H | 0.000000 | 0.000000  | -2.477349 |
| H | 0.000000 | 2.140611  | -1.198585 |
| H | 0.000000 | 2.045309  | 1.271924  |
| H | 0.000000 | -2.045309 | 1.271924  |
| H | 0.000000 | -2.140611 | -1.198585 |

pyridine 1^1A\_1 state, M06-2X(250,974)/6-311++G\*\*

|   |          |           |           |
|---|----------|-----------|-----------|
| C | 0.000000 | 0.000000  | -1.408201 |
| C | 0.000000 | 1.193884  | -0.698270 |
| C | 0.000000 | 1.137720  | 0.692320  |
| N | 0.000000 | 0.000000  | 1.385847  |
| C | 0.000000 | -1.137720 | 0.692320  |
| C | 0.000000 | -1.193884 | -0.698270 |
| H | 0.000000 | 0.000000  | -2.491991 |
| H | 0.000000 | 2.150914  | -1.204695 |
| H | 0.000000 | 2.052286  | 1.277417  |
| H | 0.000000 | -2.052286 | 1.277417  |
| H | 0.000000 | -2.150914 | -1.204695 |

pyridine 1<sup>^</sup>1A\_1 state, wB97X(250,974)/6-311++G\*\*

|   |          |           |           |
|---|----------|-----------|-----------|
| C | 0.000000 | 0.000000  | -1.406996 |
| C | 0.000000 | 1.193302  | -0.697577 |
| C | 0.000000 | 1.137405  | 0.691478  |
| N | 0.000000 | 0.000000  | 1.385094  |
| C | 0.000000 | -1.137405 | 0.691478  |
| C | 0.000000 | -1.193302 | -0.697577 |
| H | 0.000000 | 0.000000  | -2.492557 |
| H | 0.000000 | 2.151714  | -1.205205 |
| H | 0.000000 | 2.053206  | 1.278036  |
| H | 0.000000 | -2.053206 | 1.278036  |
| H | 0.000000 | -2.151714 | -1.205205 |

pyridine 1<sup>^</sup>1B\_1 state, LC-BLYP(250,974)/6-311++G\*\*

|   |           |           |           |
|---|-----------|-----------|-----------|
| C | 0.108854  | 1.345637  | 0.000000  |
| C | -0.037600 | 0.658665  | 1.211036  |
| C | -0.104173 | -0.707580 | 1.203686  |
| N | 0.223255  | -1.223160 | 0.000000  |
| C | -0.104173 | -0.707580 | -1.203686 |
| C | -0.037600 | 0.658665  | -1.211036 |
| H | 0.139531  | 2.426468  | 0.000000  |
| H | -0.198730 | 1.188485  | 2.142553  |
| H | -0.382017 | -1.332923 | 2.041678  |
| H | -0.382017 | -1.332923 | -2.041678 |
| H | -0.198730 | 1.188485  | -2.142553 |

pyridine 1<sup>^</sup>1B\_1 state, M06-2X(250,974)/6-311++G\*\*

|   |           |           |           |
|---|-----------|-----------|-----------|
| C | 0.096041  | 1.368896  | 0.000000  |
| C | -0.032432 | 0.666293  | 1.218368  |
| C | -0.085898 | -0.711243 | 1.220440  |
| N | 0.182895  | -1.250376 | 0.000000  |
| C | -0.085898 | -0.711243 | -1.220440 |
| C | -0.032432 | 0.666293  | -1.218368 |
| H | 0.114472  | 2.449472  | 0.000000  |
| H | -0.182565 | 1.184329  | 2.158909  |
| H | -0.308112 | -1.336875 | 2.073283  |
| H | -0.308112 | -1.336875 | -2.073283 |
| H | -0.182565 | 1.184329  | -2.158909 |

pyridine 1<sup>^</sup>1B\_1 state, wB97X(250,974)/6-311++G\*\*

|   |           |           |           |
|---|-----------|-----------|-----------|
| C | 0.109518  | 1.360236  | 0.000000  |
| C | -0.037379 | 0.664676  | 1.220802  |
| C | -0.100227 | -0.711473 | 1.211672  |
| N | 0.214474  | -1.239946 | 0.000000  |
| C | -0.100227 | -0.711473 | -1.211672 |
| C | -0.037379 | 0.664676  | -1.220802 |
| H | 0.132920  | 2.443416  | 0.000000  |
| H | -0.204825 | 1.189773  | 2.156513  |
| H | -0.365175 | -1.338208 | 2.055125  |
| H | -0.365175 | -1.338208 | -2.055125 |
| H | -0.204825 | 1.189773  | -2.156513 |
